# Supplementary material
Source: Research Square preprint supplement (doi:10.21203/rs.3.rs-9450977/v1)
Supplement: Supplementary file 1 [file 4b8bbbadea1f10b8983bd95d.docx]

**Table a.** Sampling sites and coordinates of urban wells in the metropolitan area of Merida

| **Municipality** | **Plant** | **Well** | **Season** | **UTM y** | **UTM x** | **ID** |
| --- | --- | --- | --- | --- | --- | --- |
| Mérida | Mérida I | 1 | rainy | 20.85005 | -89.5943167 | **1MI1** |
| Mérida | Mérida I | 2 | rainy | 20.8445167 | -89.6006 | **1MI2** |
| Mérida | Mérida I | 3 | rainy | 20.8433667 | -89.5943333 | **1MI3** |
| Mérida | Mérida I | 4 | rainy | 20.8422667 | -89.5882167 | **1MI4** |
| Mérida | Mérida I | 5 | rainy | 20.83975 | -89.6055 | **1MI5** |
| Mérida | Mérida I | 6 | rainy | 20.8384833 | -89.59955 | **1MI6** |
| Mérida | Mérida I | 7 | rainy | 20.8372333 | -89.5933 | **1MI7** |
| Mérida | Mérida I | 8 | rainy | 20.8361 | -89.5873667 | **1MI8** |
| Mérida | Mérida I | 9 | rainy | 20.8345833 | -89.6073167 | **1MI9** |
| Mérida | Mérida I | 10 | rainy | 20.83335 | -89.60125 | **1MI10** |
| Mérida | Mérida I | 11 | rainy | 20.8322 | -89.5951333 | **1MI11** |
| Mérida | Mérida I | 12 | rainy | 20.8310333 | -89.5892 | **1MI12** |
| Mérida | Mérida I | 13 | rainy | 20.8294667 | -89.60925 | **1MI13** |
| Mérida | Mérida I | 14 | rainy | 20.8282833 | -89.60315 | **1MI14** |
| Mérida | Mérida I | 15 | rainy | 20.8271333 | -89.5971167 | **1MI15** |
| Mérida | Mérida I | 16 | rainy | 20.8258833 | -89.5911 | **1MI16** |
| Mérida | Mérida I | 17 | rainy | 20.82465 | -89.5849833 | **1MI17** |
| Mérida | Mérida I | 18 | rainy | 20.82435 | -89.61115 | **1MI18** |
| Mérida | Mérida I | 19 | rainy | 20.8231333 | -89.60505 | **1MI19** |
| Mérida | Mérida I | 20 | rainy | 20.8219333 | -89.59895 | **1MI20** |
| Mérida | Mérida I | 21 | rainy | 20.82075 | -89.5429667 | **1MI21** |
| Mérida | Mérida I | 22 | rainy | 20.8195833 | -89.5868833 | **1MI22** |
| Mérida | Mérida I | 2A | rainy | 20.8409333 | -89.5981 | **1MI2A** |
| Mérida | Mérida I | 11A | rainy | 20.829 | -89.5938667 | **1MI11A** |
| Mérida | Mérida I | 25 (Auxiliar) | rainy | 20.8468167 | -89.5958667 | **1MI25A** |
| Mérida | Mérida II | 1 | rainy | 20.8842333 | -89.6923333 | **1MII1** |
| Mérida | Mérida II | 2 | rainy | 20.8802667 | -89.69385 | **1MII2** |
| Mérida | Mérida II | 3 | rainy | 20.87695 | -89.6950333 | **1MII3** |
| Mérida | Mérida II | 4 | rainy | 20.8734167 | -89.6961833 | **1MII4** |
| Mérida | Mérida II | 5 | rainy | 20.8700167 | -89.6975 | **1MII5** |
| Mérida | Mérida II | 6 | rainy | 20.8704667 | -89.69265 | **1MII6** |
| Mérida | Mérida II | 7 | rainy | 20.8738667 | -89.6915167 | **1MII7** |
| Mérida | Mérida II | 8 | rainy | 20.87725 | -89.6904 | **1MII8** |
| Mérida | Mérida II | 9 | rainy | 20.8806167 | -89.6892667 | **1MII9** |
| Mérida | Mérida III | 2A | rainy | 20.9677333 | -89.53695 | **1MIII2A** |
| Mérida | Mérida III | 2 | rainy | 20.9647833 | -89.5290167 | **1MIII2** |
| Mérida | Mérida III | 4 | rainy | 20.9652 | -89.5242 | **1MIII4** |
| Mérida | Mérida III | 6 | rainy | 20.9657833 | -89.5184333 | **1MIII6** |
| Mérida | Mérida III | 8 | rainy | 20.9661 | -89.5146333 | **1MIII8** |
| Mérida | Mérida III | 10 | rainy | 20.9666 | -89.5098 | **1MIII10** |
| Mérida | Mérida III | 12 | rainy | 20.9670167 | -89.5049833 | **1MIII12** |
| Mérida | Mérida III | 14 | rainy | 20.9674667 | -89.5002167 | **1MIII14** |
| Mérida | Mérida III | 16 | rainy | 20.9678667 | -89.4954167 | **1MIII16** |
| Mérida | Mérida III | 17 | rainy | 20.9719333 | -89.49345 | **1MIII17** |
| Mérida | Mérida III | 15 | rainy | 20.9712667 | -89.4982167 | **1MIII15** |
| Mérida | Mérida III | 11 | rainy | 20.97045 | -89.5078 | **1MIII11** |
| Mérida | Mérida III | 7 | rainy | 20.9695833 | -89.5174 | **1MIII7** |
| Mérida | Mérida III | 3 | rainy | 20.9697833 | -89.5269833 | **1MIII3** |
| Mérida | Mérida III | 1 | rainy | 20.9688167 | -89.53175 | **1MIII1** |
| Mérida | Plan de Ayala Sur | 1 | dry | 20.9106111 | -89.62025 | **1Mpa** |
| Mérida | San José Tecoh | 1 | dry | 20.9121389 | -89.6233333 | **1Msj** |
| Mérida | Hacienda | 1 | dry | 20.9314167 | -89.6096944 | **1Mha** |
| Mérida | 42 Sur | 1 | dry | 20.9495278 | -89.6128611 | **1M42** |
| Mérida | Morelos Fovisste | 1 | dry | 20.9427222 | -89.6044722 | **1Mmo** |
| Mérida | San Antonio Xluch | 1 | dry | 20.9219722 | -89.6440833 | **1Msa** |
| Mérida | Emiliano Zapata Sur | 1 | dry | 20.9269444 | -89.6488333 | **1Mzs** |
| Mérida | San Luis del Sur Dzununcan | 1 | dry | 20.8880278 | -89.6541389 | **1Msl** |
| Mérida | Graciano Ricalde | 1 | dry | 20.9244444 | -89.6849722 | **1Mgr1** |
| Mérida | Graciano Ricalde | 2 | dry | 20.9243889 | -89.6849444 | **1Mgr2** |
| Mérida | Las Americas-Captación 1 | 1 | dry | 21.063 | -89.6457778 | **1Mla1** |
| Mérida | Las Americas-Captación 1 | 2 | dry | 21.06275 | -89.6461111 | **1Mla2** |
| Mérida | Cocoyoles | 1 | dry | 21.0474167 | -89.5996944 | **1Mco** |
| Mérida | Fco.de Montejo-Captación I | 1 | dry | 21.0292778 | -89.6421944 | **1Mfm1** |
| Mérida | Fco.de Montejo-Captación I | 2 | dry | 21.0295833 | -89.6426944 | **1Mfm2** |
| Mérida | Chuburna de Hidalgo | 1 | dry | 21.0151944 | -89.626 | **1Mch** |
| Mérida | Enlace | 1 | dry | 21.0001944 | -89.6218333 | **1Men** |
| Mérida | García Ginerés | 1 | dry | 20.9897222 | -89.6296111 | **1Mgg** |
| Mérida | Xoclán | 1 | dry | 20.9741944 | -89.6641111 | **1Mx1** |
| Mérida | Xoclán | 2 | dry | 20.9744167 | -89.6648611 | **1Mx2** |
| Mérida | Nora Quintana | 1 | dry | 20.9936111 | -89.6711944 | **1Mnq** |
| Mérida | Las Aguilas II | 1 | dry | 21.0209444 | -89.5686389 | **1Ma1** |
| Mérida | Las Aguilas II | 2 | dry | 21.0209444 | -89.5686667 | **1Ma2** |
| Mérida | Colonia Maya | 1 | dry | 21.0110278 | -89.5773889 | **1Mcm** |
| Mérida | Jesus Carranza | 1 | dry | 20.9841667 | -89.604 | **1Mjc1** |
| Mérida | Jesus Carranza | 2 | dry | 20.9838333 | -89.6044444 | **1Mjc2** |
| Mérida | Emiliano Zapata Oriente | 1 | dry | 20.98325 | -89.5808056 | **1Mzo** |
| Mérida | Vergel II | 1 | dry | 20.9496944 | -89.5825 | **1Mv1** |
| Mérida | Vergel II | 2 | dry | 20.9495 | -89.5824722 | **1Mv2** |
| Mérida | Kanasín C.R.O.C | 1 | dry | 20.9347778 | -89.564 | **1Mk** |
| Mérida | Hector Victoria A. Kanasín CTM | 1 | dry | 20.9284167 | -89.5611389 | **1Mhv1** |
| Mérida | Hector Victoria A. Kanasín CTM | 2 | dry | 20.8951111 | -89.5610833 | **1Mhv2** |
| Mérida | Santa Isabel | 1 | dry | 20.9201111 | -89.5800556 | **1Msi1** |
| Mérida | Santa Isabel | 2 | dry | 20.9201389 | -89.5800833 | **1Msi2** |
| Mérida | Mulchechen | 1 | dry | 20.9241944 | -89.5911944 | **1Mmu** |
| Kanasín | Kanasín | 1 | rainy | 20.9325167 | -89.5530667 | **1K1** |
| Kanasín | Kanasín | 4 | rainy | 20.92685 | -89.55365 | **1K4** |
| Kanasín | Kanasín | 2 | rainy | 20.92865 | -89.5583333 | **1K2** |
| Kanasín | Kanasín | 3 | rainy | 20.9408 | -89.55885 | **1K3** |
| Conkal | SIDECO | 3 | rainy | 21.0819 | -89.5288167 | **1Csi** |
| Conkal | UBR | 2 | rainy | 21.0697167 | -89.5169 | **1Cub** |
| Conkal | Conkal | 1 | rainy | 21.0677 | -89.52165 | **1Cco** |
| Ucú | Ucú | 1 | rainy | 21.0310833 | -89.7465667 | **1UC1** |
| Ucú | Ucú | 2 | rainy | 21.0239833 | -89.74865 | **1UC2** |
| Umán | San Lorenzo | 1 | rainy | 20.8945667 | -89.73365 | **1Usl** |
| Umán | ACIM | 1 | rainy | 20.9187 | -89.7112333 | **1Uac** |
| Umán | Oxcum | 1 | rainy | 20.9469667 | -89.7639667 | **1Uox** |
| Umán | Umán III (Santa Elena) | 1 | rainy | 20.8751833 | -89.75835 | **1Uu** |
| Progreso | Temozón | 10 | rainy | 21.0607833 | -89.6284333 | **1Pt10** |
| Progreso | Temozón | 7 | rainy | 21.0623833 | -89.6198 | **1Pt7** |
| Progreso | Temozón | 6 | rainy | 21.0624167 | -89.6170833 | **1Pt6** |
| Progreso | Temozón | 5 | rainy | 21.0624167 | -89.6140667 | **1Pt5** |
| Progreso | Temozón | 4 | rainy | 21.0623833 | -89.6112667 | **1Pt4** |
| Progreso | Temozón | 2 | rainy | 21.0633 | -89.6044333 | **1Pt2** |
| Progreso | Temozón | 1 | rainy | 21.0638833 | -89.6000833 | **1Pt1** |
| Progreso | Tamanché | 1 | rainy | 21.1562167 | -89.648 | **1Pta1** |
| Progreso | Tamanché | 2 | rainy | 21.1896 | -89.61275 | **1Pta2** |
| Progreso | San Ignacio | 1 | rainy | 21.1604167 | -89.65295 | **1Psi** |
| Progreso | Paraíso | 1 | rainy | 21.1938667 | -89.6504 | **1Pp** |
| Progreso | Chicxulub Puerto | 2 | rainy | 21.2427667 | -89.5708167 | **1Pc2** |
| Progreso | Chicxulub Puerto | 3 | rainy | 21.23865 | -89.5689167 | **1Pc3** |
| Progreso | Chicxulub Puerto | 5 | rainy | 21.2304 | -89.56515 | **1Pc5** |
| Progreso | Chicxulub Puerto | 6 | rainy | 21.2228833 | -89.5632167 | **1Pc6** |
| Progreso | Chicxulub Puerto | 7 | rainy | 21.2221 | -89.5613 | **1Pc7** |
| Progreso | Chicxulub Puerto | 8 | rainy | 21.2179167 | -89.5593667 | **1Pc8** |
| Progreso | Chicxulub Puerto | 10 | rainy | 21.2097333 | -89.5554667 | **1Pc10** |
| Progreso | Chicxulub Puerto | 11 | rainy | 21.2051833 | -89.5531667 | **1Pc11** |
| Progreso | Sierra Papacal | 1 | rainy | 21.1262 | -89.73865 | **1Psp1** |
| Progreso | Sierra Papacal | 2 | rainy | 21.1305667 | -89.7372167 | **1Psp2** |
| Progreso | Sierra Papacal | 4 | rainy | 21.1275667 | -89.7432167 | **1Psp4** |
| Progreso | Sierra Papacal | 5 | rainy | 21.1318833 | -89.7418167 | **1Psp5** |
| Progreso | Sierra Papacal | 6 | rainy | 21.1356167 | -89.7406167 | **1Psp6** |
| Progreso | Sierra Papacal | 7 | rainy | 21.1288167 | -89.7478333 | **1Psp7** |
| Umán | Umán I | 1 | rainy | 20.8724833 | -89.72675 | **1U1** |
| Umán | Umán I | 2 | rainy | 20.8724833 | -89.72675 | **1U2** |

**Table b.** Comparison of Salinity (PSU), Temperature (°C), TDS (g L-1), pH, EC (mS cm-1), and DO (mg L-1) values between the urban wells of the metropolitan area of Merida and seasons (dry and rainy). The W estimator corresponds to two-sample Mann-Whitney tests. The H indicates a Kruskal-Wallis test with its corresponding post hoc Dunn test (*D*) significance matrix below

| **Variable** | **Factor** | **Tests p** | |
| --- | --- | --- | --- |
| **Salinity** | Season | W = 1070 | < 0.05 |
|  | Wells | H = 5.9 | 0.3 |
|  |  | *D* | *1* |
|  |  |  |  |
| **Temperature** | Season | W = 2097 | < 0.05 |
|  | Wells | H = 27.3 | < 0.05 |
|  |  | *D* |  |
|  |  |  | ***Merida*** |
|  |  | ***Ucu*** | *< 0.05* |
|  |  | ***Uman*** | *< 0.05* |
| **pH** |
|  | Season | W = 2475 | < 0.05 |
|  | Wells | H = 20.8 | < 0.05 |
|  |  | *D* |  |
|  |  |  | ***Uman*** |
|  |  | ***Merida*** | *< 0.05* |
|  |  | ***Kanasin*** | *< 0.05* |
|  |  |  |  |
| **TDS** | Season | W = 1079 | < 0.05 |
|  | Wells | H = 5.2 | 0.4 |
|  |  | *D* | *1* |
|  |  |  |  |
| **EC** | Season | W = 1069 | < 0.05 |
|  | Wells | H = 5.1 | 0.4 |
|  |  | *D* | *1* |
|  |  |  |  |
| **DO** | Season | W = 1608 | 0.8 |
|  | Wells | H = 14.1 | 0.02 |
|  |  | *D* | *0.6* |

**Table c.** Permissible limit (µg L-1) for the analyzed metals according to the NOM-127-SSA1-1994

| **Metal** | **Permissible Limit** |
| --- | --- |
| **Ba** | 700 |
| **Cu** | 2000 |
| **Pb** | 25 |
| **Cd** | 5 |
| **Cr** | 50 |
| **As** | 50 |
| **Hg** | 1 |
| **Mn** | 150 |
| **Fe** | 300 |
| **Zn** | 5000 |
| **Al** | 200 |

**Table d.** Comparison of for Ba, Cu, Pb, Cd, Cr, As, Hg, Mn, Fe, Zn, Al (µg L-1) values between the urban wells of the metropolitan area of Merida and seasons (dry and rainy). The W estimator corresponds to two-sample Mann-Whitney tests. The H indicates a Kruskal-Wallis test with its corresponding post hoc Dunn test (*D*) significance matrix below

| **Metal** | **Factor** | **Tests p** | |
| --- | --- | --- | --- |
| **Ba** | Season | W = 1724 | 0.4 |
|  | Wells | H = 7.6 | 0.2 |
|  |  | *D* | *1* |
|  |  |  |  |
| **Cu** | Season | W = 1038 | < 0.05 |
|  | Wells | H = 24.8 | < 0.05 |
|  |  | *D* |  |
|  |  |  | ***Uman*** |
|  |  | ***Merida*** | *< 0.05* |
| **Pb** |
|  | Season | W = 1462 | 0.6 |
|  | Wells | H = 1.4 | 0.9 |
|  |  | *D* | *1* |
|  |  |  |  |
| **Cd** | Season | W = 831 | < 0.05 |
|  | Wells | H = 9.6 | 0.1 |
|  |  | *D* | *0.6* |
|  |  |  |  |
| **Cr** | Season | W = 1286 | 0.1 |
|  | Wells | H = 2.5 | 0.7 |
|  |  | *D* | *1* |
|  |  |  |  |
| **As** | Season | W = 1852 | 0.1 |
|  | Wells | H = 50.9 | < 0.05 |
|  |  | *D* |  |
|  |  | ***Uman*** | ***Conkal*** |
|  | ***Merida*** | *< 0.05* | *< 0.05* |
|  | ***Progreso*** | *< 0.05* | *< 0.05* |
|  | ***Ucu*** | *< 0.05* | *< 0.05* |
|  |  |  |  |
| **Hg** | Season | W = 1383 | 0.2 |
|  | Wells | H = 47.4 | < 0.05 |
|  |  | *D* |  |
|  |  |  | ***Merida*** |
|  |  | ***Kanasin*** | *< 0.05* |
|  |  | ***Progreso*** | *< 0.05* |
|  |  | ***Uman*** | *< 0.05* |
|  |  |  |  |
| **Mn** | Season | W = 1213 | 0.06 |
|  | Wells | H = 4.13 | 0.5 |
|  |  | *D* | *1* |
|  |  |  |  |
| **Fe** | Season | W = 1948 | < 0.05 |
|  | Wells | H = 2.3 | 0.8 |
|  |  | *D* | *1* |
|  |  |  |  |
| **Zn** | Season | W = 1470 | 0.6 |
|  | Wells | H = 13.1 | 0.02 |
|  |  | *D* | *0.8* |
|  |  |  |  |
| **Al** | Season | W = 775 | < 0.05 |
|  | Wells | H = 9.1 | 0.1 |
