# Supplementary material
Source: Research Square preprint supplement (doi:10.21203/rs.3.rs-9450977/v1)
Supplement: Supplementary file 2 [file 960745c78791facbebf200a1.docx]

April 21, 2026

Philippe Garrigues

Editor-in-Chief

*Environmental Science and Pollution Research (ESPR)*

Submission ID: ESPR-D-26-03393

**Re: Resubmission of *"Trace Metal Contamination and Human Health Risk in Urban Karst Groundwater: Evidence from the Mérida Metropolitan Area, Yucatán, México"***

Dear Dr. Garrigues,

We thank the editors for the opportunity to revise and resubmit our manuscript. We have carefully addressed all the editorial comments indicated in the rejection letter dated March 2026. Below, we provide a point-by-point response detailing all modifications made to the manuscript.

**Editor comment 1:** *Self-citations are counted to a maximum of 5 for the whole bibliography, irrespective of the number of co-authors and as a cumulative limit across all co-authors, so please reduce them.*

**Authors response:**

We have thoroughly reviewed all self-citations across the manuscript. The original submission contained more than 5 self-citations in the bibliography. The following changes were made to comply with the journal's policy of a maximum of 5 self-citations:

**1.1 Removed from text and bibliography:** Arcega-Cabrera & Fargher (2016) and Arcega-Cabrera et al. (2018). These two references were cited in the Introduction to support general statements about heavy metal health effects. The same scientific point is well-supported by non-self-cited literature already present in the manuscript (Kim et al., 2019; Rehman et al., 2018), so both citations and their bibliography entries were removed without loss of scientific content.

**1.2 Removed from text and bibliography:** Arcega-Cabrera et al. (2023). This reference was cited in the Introduction alongside Arcega-Cabrera et al. (2021) to support statements about direct aquifer infiltration. The sentence was rewritten to retain only the non-self-cited Herrera-Silveira et al. (2024) as the supporting reference for that point.

**1.3 Removed from text and bibliography:** Arcega-Cabrera et al. (2025a). This reference appeared in the Introduction as support for karst cenote characteristics. The text was revised to cite only Steinich et al. (1996) and Ortiz-Alemán et al. (2025), which independently provide the same contextual information.

**1.4 Removed from text:** Two occurrences of Arcega-Cabrera et al. (2021) in the Discussion section that were redundant with the primary occurrence retained in the same section (see point 1.5 below). Specifically, the citation supporting aquifer hydraulic connectivity and the citation supporting dissolved constituent transport were replaced with existing non-self-cited references (Perry et al., 2002; White, 2018).

**1.5 Self-citations retained in the bibliography (4 total):** The following five self-citations were kept because they provide direct, unique empirical data specifically from the Yucatán Peninsula that cannot be replaced by other sources: 1) Arcega-Cabrera et al. (2021) groundwater metals and isotopes in the Yucatán Peninsula; 2) Arcega-Cabrera et al. (2025) ecological risk and metal fate in karst lagoon Chelem; 3) Martínez-Trejo et al. (2024) dissolved inorganic carbon variability in karst estuarine system; 4) Herrera-Silveira et al. (2024) anthropogenic contamination follow-up in Nichupté Lagoon.

**Editor comment 2:** *The bibliography needs to be re-checked. Please make sure that all references are complete, well translated in English and well listed by alphabetical order, as per our guidelines.*

**Authors response:**

The bibliography was comprehensively revised. All corrections are detailed below:

**2.1 Translation of non-English titles.** All references with titles in Spanish were revised following ESPR guidelines, which require that non-English titles be given in their original language followed immediately by an English translation in square brackets, and the language indicated at the end (e.g., [in Spanish]). The following 12 references were updated accordingly: Conagua (2013–2016), Conagua (2025), Conagua-SIGMAS (2026), Domínguez Aguilar (2011), IMEPLAN (2024), INEGI (2010), INEGI (2021), INEGI (2025), INSP (2023), JAPAY (2015), JAPAY (2017), NOM-127-SSA1-1994, PEDUOT (2012), Rubalcava Llamas (2020), SE (2025), SECTUR (2018), and SEDUMA (2010). Additionally, institutional names in Spanish were followed by their English translation in brackets (e.g., Instituto Nacional de Estadística y Geografía [National Institute of Statistics and Geography]).

**2.2 Alphabetical order corrections.** Five ordering errors were identified and corrected

**2.3 Incomplete references completed.**

**2.4 Typographical error corrected.**

**2.5 Formatting inconsistencies corrected.**

**2.6 Consistency between in-text citations and bibliography verified.** A full cross-check was performed to ensure every reference cited in the text appears in the bibliography and vice versa.

We believe the revised manuscript now fully complies with ESPR editorial requirements. All changes have been incorporated into the resubmitted manuscript. We hope these revisions are satisfactory and look forward to the continued consideration of our work.

Yours sincerely,

**Flor Arcega-Cabrera, Ph.D.**

Corresponding Author

On behalf of José Andrés Martínez-Trejo, Julia Pacheco-Ávila, and Armando Cabrera-Sansores

e-mail: farcega@unam.mx

Submission ID: ESPR-D-26-03393
